# Supplementary material
Source: PubMed Central journal article supplement (PMC4066532)
Supplement: 1316902111_pnas.201316902SI.pdf [file 1316902111_pnas.201316902SI.pdf]

# Supporting Information

Warfield et al. 10.1073/pnas.1316902111

**Table S1. Hematology results**

| Hematology type and animal ID            | Prestudy | Day 56 | Day 70 | Day 77 | Day 84 |
|------------------------------------------|----------|--------|--------|--------|--------|
| White blood cell count, (x $E3/mm^3$ )   |          |        |        |        |        |
| C0710                                    | 12.3     | 17.9   | 8.8    | 9.0    | 10.5   |
| C0712                                    | 10.6     | 13.5   | 10.4   | 12.2   | 10.5   |
| A195E                                    | 18.3     | 11.8   | 13.0   | 19.8   | 15.2   |
| 89A009                                   | 8.0      | 14.9   | 8.4    | 9.9    | 10.4   |
| 89A011                                   | 7.3      | 10.6   | 9.3    | 11.4   | 12.2   |
| A242E                                    | 8.8      | 10.3   | 10.1   | 9.9    | 9.3    |
| Red blood cell count (x $E6/mm^3$ )      |          |        |        |        |        |
| C0710                                    | 4.69     | 4.52   | 4.64   | 4.66   | 4.74   |
| C0712                                    | 4.93     | 4.78   | 4.98   | 4.96   | 5.13   |
| A195E                                    | 5.82     | 5.88   | 5.84   | 5.76   | 5.71   |
| 9A009                                    | 5.50     | 5.69   | 5.59   | 5.54   | 5.48   |
| 89A011                                   | 5.48     | 5.38   | 5.16   | 5.10   | 5.26   |
| A242E                                    | 6.37     | 6.12   | 6.24   | 6.13   | 6.06   |
| Hemoglobin concentration (g/dL)          |          |        |        |        |        |
| C0710                                    | 13.1     | 12.5   | 12.8   | 12.7   | 12.9   |
| C0712                                    | 13.1     | 13.1   | 13.1   | 13.1   | 13.7   |
| A195E                                    | 15.0     | 15.2   | 15.3   | 15.1   | 15.0   |
| 89A009                                   | 15.6     | 15.7   | 15.7   | 15.5   | 15.3   |
| 89A011                                   | 14.4     | 13.7   | 13.6   | 13.5   | 14.2   |
| A242E                                    | 17.7     | 16.9   | 17.2   | 17.4   | 17.0   |
| Hematocrit (%)                           |          |        |        |        |        |
| C0710                                    | 39.1     | 37.5   | 38.3   | 38.5   | 39.5   |
| C0712                                    | 40.0     | 39.5   | 40.1   | 39.9   | 41.2   |
| A195E                                    | 46.6     | 46.9   | 46.6   | 46.2   | 45.7   |
| 89A009                                   | 46.4     | 47.6   | 46.9   | 46.8   | 46.3   |
| 89A011                                   | 43.9     | 43.0   | 41.6   | 41.4   | 42.7   |
| A242E                                    | 53.0     | 51.8   | 52.3   | 51.7   | 51.3   |
| Mean corpuscular volume (fl)             |          |        |        |        |        |
| C0710                                    | 83.2     | 83.1   | 82.6   | 82.6   | 83.4   |
| C0712                                    | 81.1     | 82.7   | 80.7   | 80.4   | 80.3   |
| A195E                                    | 80.2     | 79.8   | 79.8   | 80.2   | 80.0   |
| 89A009                                   | 84.4     | 83.7   | 83.8   | 84.5   | 84.4   |
| 89A011                                   | 80.2     | 80.0   | 80.6   | 81.2   | 81.0   |
| A242E                                    | 83.1     | 84.7   | 83.8   | 84.4   | 84.7   |
| Mean corpuscular hemoglobin (pg)         |          |        |        |        |        |
| C0710                                    | 27.8     | 27.6   | 27.5   | 27.3   | 27.2   |
| C0712                                    | 26.6     | 27.5   | 26.3   | 26.3   | 26.7   |
| A195E                                    | 25.8     | 25.8   | 26.1   | 26.3   | 26.3   |
| 89A009                                   | 28.3     | 27.6   | 28.1   | 28.0   | 27.9   |
| 89A011                                   | 26.3     | 25.5   | 26.3   | 26.5   | 26.9   |
| A242E                                    | 27.8     | 27.6   | 27.6   | 28.3   | 28.1   |
| Mean corpuscular Hb concentration (g/dL) |          |        |        |        |        |
| C0710                                    | 33.4     | 33.2   | 33.3   | 33.0   | 32.5   |
| C0712                                    | 32.8     | 33.2   | 32.6   | 32.8   | 33.2   |
| A195E                                    | 32.2     | 32.4   | 32.8   | 32.8   | 32.9   |

**Table S1. Cont.**

| Hematology type and animal ID       | Prestudy | Day 56 | Day 70 | Day 77 | Day 84 |
|-------------------------------------|----------|--------|--------|--------|--------|
| 89A009                              | 33.5     | 33.0   | 33.5   | 33.1   | 33.1   |
| 89A011                              | 32.8     | 31.8   | 32.7   | 32.6   | 33.2   |
| A242E                               | 33.4     | 32.6   | 33.0   | 33.6   | 33.2   |
| Red cell distribution width (%)     |          |        |        |        |        |
| C0710                               | 15.1     | 15.9   | 16.0   | 15.7   | 15.3   |
| C0712                               | 14.6     | 15.4   | 14.5   | 14.7   | 14.8   |
| A195E                               | 16.5     | 16.5   | 16.4   | 16.8   | 16.4   |
| 89A009                              | 14.9     | 15.0   | 15.4   | 15.4   | 15.1   |
| 89A011                              | 15.1     | 14.5   | 15.1   | 15.1   | 15.1   |
| A242E                               | 15.1     | 15.4   | 15.8   | 15.2   | 15.7   |
| Platelet count (x $10^3$ /mm $^3$ ) |          |        |        |        |        |
| C0710                               | 154      | 137    | 171    | 199    | 193    |
| C0712                               | 212      | 282    | 152    | 152    | 174    |
| A195E                               | 283      | 303    | 275    | 287    | 279    |
| 89A009                              | 212      | 198    | 192    | 212    | 202    |
| 89A011                              | 190      | 178    | 182    | 201    | 216    |
| A242E                               | 183      | 159    | 179    | 171    | 164    |
| Mean platelet volume (fl)           |          |        |        |        |        |
| C0710                               | 10.5     | 11.8   | 11.1   | 11.1   | 10.6   |
| C0712                               | 10.0     | 14.5   | 11.2   | 11.0   | 11.4   |
| A195E                               | 9.3      | 10.1   | 9.8    | 9.6    | 9.8    |
| 89A009                              | 9.6      | 10.9   | 10.5   | 10.3   | 10.4   |
| 89A011                              | 9.7      | 10.8   | 10.4   | 10.2   | 10.7   |
| A242E                               | 8.3      | 8.8    | 8.4    | 8.7    | 8.8    |
| % Neutrophils                       |          |        |        |        |        |
| C0710                               | 55.0     | 84.1   | 55.3   | 61.3   | 57.6   |
| C0712                               | 59.9     | 54.6   | 41.3   | 42.3   | 43.2   |
| A195E                               | 82.6     | 71.8   | 58.6   | 81.6   | 81.0   |
| 89A009                              | 42.7     | 75.8   | 42.8   | 59.0   | 46.0   |
| 89A011                              | 51.4     | 70.6   | 62.5   | 70.2   | 71.4   |
| A242E                               | 60.9     | 57.6   | 43.3   | 48.4   | 55.4   |
| % Lymphocytes                       |          |        |        |        |        |
| C0710                               | 39.6     | 11.1   | 39.8   | 34.5   | 38.7   |
| C0712                               | 32.1     | 36.4   | 47.2   | 49.9   | 47.0   |
| A195E                               | 10.3     | 21.4   | 33.3   | 13.2   | 14.4   |
| 89A009                              | 48.3     | 18.2   | 49.4   | 33.7   | 45.7   |
| 89A011                              | 40.9     | 20.5   | 31.2   | 23.1   | 20.1   |
| A242E                               | 32.3     | 35.0   | 44.2   | 42.8   | 35.9   |
| % Monocytes                         |          |        |        |        |        |
| C0710                               | 5.2      | 4.6    | 3.3    | 3.5    | 3.5    |
| C0712                               | 4.5      | 5.3    | 5.6    | 3.7    | 4.9    |
| A195E                               | 5.5      | 5.2    | 5.4    | 4.2    | 4.2    |
| 89A009                              | 7.6      | 4.8    | 6.7    | 7.1    | 7.3    |
| 89A011                              | 7.4      | 7.7    | 6.0    | 6.2    | 6.8    |
| A242E                               | 4.8      | 6.6    | 9.2    | 7.0    | 6.9    |
| % Eosinophils                       |          |        |        |        |        |
| C0710                               | 0.0      | 0.0    | 1.2    | 0.5    | 0.0    |
| C0712                               | 3.3      | 3.3    | 5.4    | 3.6    | 4.5    |
| A195E                               | 1.3      | 1.3    | 2.3    | 0.7    | 0.0    |
| 89A009                              | 1.3      | 1.0    | 1.0    | 0.0    | 0.9    |
| 89A011                              | 0.0      | 0.9    | 0.0    | 0.3    | 1.2    |
| A242E                               | 2.0      | 0.7    | 3.2    | 1.7    | 1.7    |
| % Basophils                         |          |        |        |        |        |
| C0710                               | 0.2      | 0.2    | 0.4    | 0.2    | 0.2    |
| C0712                               | 0.2      | 0.4    | 0.5    | 0.5    | 0.4    |
| A195E                               | 0.3      | 0.3    | 0.4    | 0.3    | 0.4    |
| 89A009                              | 0.1      | 0.2    | 0.1    | 0.2    | 0.1    |
| 89A011                              | 0.3      | 0.3    | 0.3    | 0.2    | 0.5    |
| A242E                               | 0.0      | 0.1    | 0.1    | 0.1    | 0.1    |

**Table S1. Cont.**

| Hematology type and animal ID                  | Prestudy | Day 56 | Day 70 | Day 77 | Day 84 |
|------------------------------------------------|----------|--------|--------|--------|--------|
| <b>No. neutrophils (x<math>E3/mm^3</math>)</b> |          |        |        |        |        |
| C0710                                          | 6.8      | 15.0   | 4.9    | 5.5    | 6.0    |
| C0712                                          | 6.3      | 7.4    | 4.3    | 5.2    | 4.5    |
| A195E                                          | 15.1     | 8.5    | 7.6    | 16.2   | 12.3   |
| 89A009                                         | 3.4      | 11.3   | 3.6    | 5.8    | 4.8    |
| 89A011                                         | 3.8      | 7.5    | 5.8    | 8.0    | 8.7    |
| A242E                                          | 5.4      | 5.9    | 4.4    | 4.8    | 5.1    |
| <b>No. lymphocytes (x<math>E3/mm^3</math>)</b> |          |        |        |        |        |
| C0710                                          | 4.9      | 2.0    | 3.5    | 3.1    | 4.1    |
| C0712                                          | 3.4      | 4.9    | 4.9    | 6.1    | 4.9    |
| A195E                                          | 1.9      | 2.5    | 4.3    | 2.6    | 2.2    |
| 89A009                                         | 3.9      | 2.7    | 4.1    | 3.3    | 4.8    |
| 89A011                                         | 3.0      | 2.2    | 2.9    | 2.6    | 2.4    |
| A242E                                          | 2.9      | 3.6    | 4.4    | 4.3    | 3.3    |
| <b>No. monocytes (x<math>E3/mm^3</math>)</b>   |          |        |        |        |        |
| C0710                                          | 0.6      | 0.8    | 0.3    | 0.3    | 0.4    |
| C0712                                          | 0.5      | 0.7    | 0.6    | 0.4    | 0.5    |
| A195E                                          | 1.0      | 0.6    | 0.7    | 0.8    | 0.6    |
| 89A009                                         | 0.6      | 0.7    | 0.6    | 0.7    | 0.8    |
| 89A011                                         | 0.5      | 0.8    | 0.6    | 0.7    | 0.8    |
| A242E                                          | 0.4      | 0.7    | 0.9    | 0.7    | 0.6    |
| <b>No. eosinophils (x<math>E3/mm^3</math>)</b> |          |        |        |        |        |
| C0710                                          | 0.0      | 0.0    | 0.1    | 0.0    | 0.0    |
| C0712                                          | 0.3      | 0.4    | 0.6    | 0.4    | 0.5    |
| A195E                                          | 0.2      | 0.1    | 0.3    | 0.1    | 0.0    |
| 89A009                                         | 0.1      | 0.1    | 0.1    | 0.0    | 0.1    |
| 89A011                                         | 0.0      | 0.1    | 0.0    | 0.0    | 0.2    |
| A242E                                          | 0.2      | 0.1    | 0.3    | 0.2    | 0.2    |
| <b>No. basophils (x<math>E3/mm^3</math>)</b>   |          |        |        |        |        |
| C0710                                          | 0.0      | 0.0    | 0.0    | 0.0    | 0.0    |
| C0712                                          | 0.0      | 0.1    | 0.0    | 0.1    | 0.0    |
| A195E                                          | 0.1      | 0.0    | 0.1    | 0.1    | 0.1    |
| 89A009                                         | 0.0      | 0.0    | 0.0    | 0.0    | 0.0    |
| 89A011                                         | 0.0      | 0.0    | 0.0    | 0.0    | 0.1    |
| A242E                                          | 0.0      | 0.0    | 0.0    | 0.0    | 0.0    |

Blood samples were drawn from six chimpanzees before vaccination and on days 56, 70, 77, and 84 postvaccination. Units for each cell fraction are given in parentheses. Chimpanzees were vaccinated for the third time on day 56.

**Table S2. Blood chemistry results**

| Chemistry test<br>and animal ID                          | Prestudy | Day<br>56 | Day 70 | Day<br>77 | Day 84 |
|----------------------------------------------------------|----------|-----------|--------|-----------|--------|
| <b>Sodium</b><br>(mmol/L)                                |          |           |        |           |        |
| C0710                                                    | 139.0    | 136.0     | 140.0  | 140.0     | 140.0  |
| C0712                                                    | 140.0    | 139.0     | 140.0  | 139.0     | 140.0  |
| A195E                                                    | 140.0    | 139.0     | 140.0  | 140.0     | 139.0  |
| 89A009                                                   | 141.0    | 140.0     | 139.0  | 139.0     | 138.0  |
| 89A011                                                   | 140.0    | 139.0     | 140.0  | 141.0     | 139.0  |
| A242E                                                    | 144.0    | 142.0     | 141.0  | 140.0     | 141.0  |
| <b>Potassium</b><br>(mmol/L)                             |          |           |        |           |        |
| C0710                                                    | 3.9      | 2.9       | 3.6    | 3.9       | 4.1    |
| C0712                                                    | 4.0      | 3.7       | 4.0    | 4.2       | 3.7    |
| A195E                                                    | 4.0      | 4.1       | 3.9    | 4.0       | 3.9    |
| 89A009                                                   | 4.1      | 3.4       | 3.5    | 3.9       | 3.9    |
| 89A011                                                   | 3.6      | 2.6       | 2.9    | 3.5       | 3.2    |
| A242E                                                    | 3.5      | 3.2       | 3.3    | 3.0       | 3.2    |
| <b>Chloride</b><br>(mmol/L)                              |          |           |        |           |        |
| C0710                                                    | 101.0    | 98.0      | 101.0  | 102.0     | 101.0  |
| C0712                                                    | 104.0    | 103.0     | 103.0  | 102.0     | 102.0  |
| A195E                                                    | 101.0    | 100.0     | 100.0  | 101.0     | 101.0  |
| 89A009                                                   | 103.0    | 101.0     | 100.0  | 100.0     | 103.0  |
| 89A011                                                   | 102.0    | 100.0     | 99.0   | 100.0     | 100.0  |
| A242E                                                    | 99.0     | 97.0      | 98.0   | 97.0      | 99.0   |
| <b>Total CO<sub>2</sub></b><br>(bicarbonate)<br>(mmol/L) |          |           |        |           |        |
| C0710                                                    | 28.2     | 23.5      | 24.8   | 26.5      | 26.8   |
| C0712                                                    | 23.8     | 23.0      | 22.2   | 25.1      | 27.3   |
| A195E                                                    | 29.7     | 26.5      | 29.2   | 28.7      | 30.1   |
| 89A009                                                   | 30.2     | 29.6      | 28.6   | 27.7      | 26.4   |
| 89A011                                                   | 30.0     | 24.5      | 28.2   | 30.4      | 29.1   |
| A242E                                                    | 29.9     | 34.7      | 34.0   | 32.2      | 37.2   |
| <b>Glucose</b><br>(mg/dL)                                |          |           |        |           |        |
| C0710                                                    | 91       | 135       | 96     | 95        | 102    |
| C0712                                                    | 76       | 72        | 79     | 87        | 74     |
| A195E                                                    | 73       | 67        | 77     | 79        | 71     |
| 89A009                                                   | 80       | 71        | 84     | 74        | 86     |
| 89A011                                                   | 75       | 65        | 72     | 60        | 74     |
| A242E                                                    | 107      | 93        | 110    | 93        | 102    |
| <b>Blood urea<br/>nitrogen</b><br>(mg/dL)                |          |           |        |           |        |
| C0710                                                    | 15       | 8         | 9      | 10        | 11     |
| C0712                                                    | 16       | 11        | 9      | 11        | 12     |
| A195E                                                    | 16       | 14        | 11     | 12        | 12     |
| 89A009                                                   | 12       | 10        | 9      | 10        | 9      |
| 89A011                                                   | 18       | 9         | 11     | 11        | 10     |
| A242E                                                    | 15       | 11        | 11     | 10        | 11     |
| <b>Creatinine</b><br>(mg/dL)                             |          |           |        |           |        |
| C0710                                                    | 0.9      | 1.2       | 0.9    | 0.9       | 0.9    |
| C0712                                                    | 0.9      | 0.8       | 1.1    | 1.1       | 1.1    |
| A195E                                                    | 0.8      | 13.0      | 1.1    | 1.1       | 1.1    |
| 89A009                                                   | 0.9      | 1.2       | 1.2    | 1.1       | 0.9    |
| 89A011                                                   | 1.2      | 1.3       | 1.3    | 1.2       | 1.1    |
| A242E                                                    | 1.1      | 1.4       | 1.2    | 1.1       | 1.2    |
| <b>Total protein</b><br>(g/dL)                           |          |           |        |           |        |
| C0710                                                    | 8.1      | 7.2       | 8.7    | 8.4       | 8.8    |
| C0712                                                    | 8.4      | 8.0       | 8.3    | 7.8       | 8.5    |
| A195E                                                    | 8.3      | 8.0       | 7.8    | 7.6       | 8.0    |

**Table S2. Cont.**

| Chemistry test and animal ID   | Prestudy | Day 56 | Day 70 | Day 77 | Day 84 |
|--------------------------------|----------|--------|--------|--------|--------|
| 89A009                         | 7.8      | 8.1    | 7.9    | 7.6    | 8.5    |
| 89A011                         | 8.8      | 9.0    | 8.8    | 8.2    | 8.8    |
| A242E                          | 8.2      | 8.6    | 8.4    | 8.2    | 8.5    |
| <b>Albumin (g/dL)</b>          |          |        |        |        |        |
| C0710                          | 2.4      | 2.2    | 2.7    | 2.6    | 2.8    |
| C0712                          | 2.6      | 2.6    | 2.7    | 2.7    | 2.8    |
| A195E                          | 2.0      | 1.8    | 1.7    | 1.7    | 1.8    |
| 89A009                         | 2.4      | 2.6    | 2.5    | 2.5    | 2.8    |
| 89A011                         | 2.2      | 2.4    | 2.4    | 2.2    | 2.3    |
| A242E                          | 2.5      | 2.7    | 2.5    | 2.5    | 2.7    |
| <b>Globulin (g/dL)</b>         |          |        |        |        |        |
| C0710                          | 5.7      | 5.0    | 6.0    | 5.8    | 6.0    |
| C0712                          | 5.8      | 5.4    | 5.6    | 5.1    | 5.7    |
| A195E                          | 6.3      | 6.2    | 6.1    | 5.9    | 6.2    |
| 89A009                         | 5.4      | 5.5    | 5.4    | 5.1    | 5.7    |
| 89A011                         | 6.6      | 6.6    | 6.4    | 6.0    | 6.5    |
| A242E                          | 5.7      | 5.9    | 5.9    | 5.7    | 5.8    |
| <b>A/G ratio</b>               |          |        |        |        |        |
| C0710                          | 0.4      | 0.4    | 0.5    | 0.5    | 0.5    |
| C0712                          | 0.5      | 0.5    | 0.5    | 0.5    | 0.5    |
| A195E                          | 0.3      | 0.3    | 0.3    | 0.3    | 0.3    |
| 89A009                         | 0.4      | 0.5    | 0.5    | 0.5    | 0.5    |
| 89A011                         | 0.3      | 0.4    | 0.4    | 0.4    | 0.4    |
| A242E                          | 0.4      | 0.5    | 0.4    | 0.4    | 0.5    |
| <b>Total bilirubin (mg/dL)</b> |          |        |        |        |        |
| C0710                          | 0.2      | 0.5    | 0.3    | 0.2    | 0.2    |
| C0712                          | 0.2      | 0.1    | 0.3    | 0.1    | 0.2    |
| A195E                          | 0.3      | 0.3    | 0.2    | 0.2    | 0.3    |
| 89A009                         | 0.2      | 0.4    | 0.2    | 0.3    | 0.2    |
| 89A011                         | 0.2      | 0.3    | 0.2    | 0.2    | 0.2    |
| A242E                          | 0.3      | 0.4    | 0.3    | 0.3    | 0.2    |
| <b>Calcium (mg/dL)</b>         |          |        |        |        |        |
| C0710                          | 9.0      | 8.9    | 9.9    | 9.7    | 9.7    |
| C0712                          | 9.4      | 9.5    | 9.7    | 9.5    | 9.7    |
| A195E                          | 8.8      | 9.5    | 9.4    | 9.3    | 9.5    |
| 89A009                         | 8.8      | 9.3    | 9.1    | 9.3    | 9.2    |
| 89A011                         | 9.1      | 9.6    | 9.6    | 9.5    | 9.6    |
| A242E                          | 9.2      | 9.6    | 9.5    | 9.7    | 9.6    |
| <b>Phosphorus (mg/dL)</b>      |          |        |        |        |        |
| C0710                          | 4.9      | 2.7    | 5.5    | 5.0    | 4.7    |
| C0712                          | 3.7      | 4.2    | 5.0    | 4.6    | 4.6    |
| A195E                          | 3.7      | 4.0    | 3.8    | 3.2    | 2.8    |
| 89A009                         | 3.7      | 4.2    | 4.2    | 3.4    | 3.1    |
| 89A011                         | 3.6      | 3.6    | 2.9    | 3.0    | 2.9    |
| A242E                          | 3.5      | 3.7    | 4.5    | 4.6    | 3.0    |
| <b>LDH (U/L)</b>               |          |        |        |        |        |
| C0710                          | 273      | 237    | 250    | 240    | 281    |
| C0712                          | 262      | 350    | 347    | 328    | 323    |
| A195E                          | 379      | 344    | 295    | 418    | 405    |
| 89A009                         | 217      | 253    | 260    | 248    | 245    |
| 89A011                         | 345      | 376    | 359    | 391    | 411    |
| A242E                          | 338      | 469    | 377    | 374    | 399    |
| <b>GGT (U/L)</b>               |          |        |        |        |        |
| C0710                          | 41       | 38     | 42     | 41     | 40     |
| C0712                          | 37       | 43     | 38     | 36     | 67     |
| A195E                          | 85       | 69     | 67     | 70     | 64     |
| 89A009                         | 48       | 45     | 42     | 43     | 43     |

**Table S2. Cont.**

| Chemistry test and animal ID | Prestudy | Day 56 | Day 70 | Day 77 | Day 84 |
|------------------------------|----------|--------|--------|--------|--------|
| 89A011                       | 66       | 57     | 59     | 57     | 55     |
| A242E                        | 51       | 50     | 48     | 49     | 48     |
| Alkaline phosphatase (U/L)   |          |        |        |        |        |
| C0710                        | 77       | 55     | 63     | 63     | 63     |
| C0712                        | 73       | 64     | 73     | 64     | 71     |
| A195E                        | 162      | 127    | 125    | 126    | 130    |
| 89A009                       | 84       | 75     | 67     | 73     | 71     |
| 89A011                       | 89       | 86     | 68     | 73     | 77     |
| A242E                        | 97       | 77     | 75     | 73     | 76     |
| ALT (U/L)                    |          |        |        |        |        |
| C0710                        | 37       | 35     | 38     | 39     | 39     |
| C0712                        | 42       | 40     | 41     | 45     | 58     |
| A195E                        | 54       | 43     | 50     | 50     | 47     |
| 89A009                       | 68       | 64     | 69     | 62     | 63     |
| 89A011                       | 46       | 45     | 50     | 51     | 52     |
| A242E                        | 78       | 36     | 65     | 67     | 63     |
| AST (U/L)                    |          |        |        |        |        |
| C0710                        | 22       | 14     | 16     | 18     | 14     |
| C0712                        | 20       | 19     | 22     | 26     | 19     |
| A195E                        | 54       | 38     | 40     | 44     | 37     |
| 89A009                       | 24       | 25     | 26     | 23     | 23     |
| 89A011                       | 29       | 33     | 29     | 30     | 30     |
| A242E                        | 49       | 54     | 41     | 40     | 33     |

Blood samples were drawn from six chimpanzees before vaccination and on days 56, 70, 77, and 84 postvaccination. Units for each cell fraction are given in parentheses. Chimpanzees were vaccinated for the third time on day 56. ALT, alanine aminotransferase; AST, aspartate aminotransferase; GGT,  $\gamma$ -glutamyltransferase; LDH, Lactate dehydrogenase.
